# Supplementary material for: Anthracycline-based and gemcitabine-based chemotherapy in the adjuvant setting for stage I uterine leiomyosarcoma: a retrospective analysis at two reference centers
Source: PubMed Central journal article supplement (PMC7456084; doi:10.1186/s13569-020-00139-3), 2020-08-28
Supplement: 13569_2020_139_MOESM1_ESM.pdf [file 13569_2020_139_MOESM1_ESM.pdf]

**Additional Table 1. Specific adjuvant chemotherapy regimens.**

| <b>Gemcitabine-based adjuvant chemotherapy</b> | <b>Total (N=43)<br/>N (%)</b> |
|------------------------------------------------|-------------------------------|
| Gemcitabine plus docetaxel                     | 40 (93)                       |
| Gemcitabine plus dacarbazine                   | 3 (7)                         |

  

| <b>Athracycline-based adjuvant chemotherapy</b> | <b>Total (N=66)<br/>N (%)</b> |
|-------------------------------------------------|-------------------------------|
| Doxorubicin                                     | 2 (3)                         |
| Epirubicin                                      | 2 (3)                         |
| Doxorubicin plus ifosfamide                     | 8 (12)                        |
| Epirubicin plus ifosfamide                      | 50 (76)                       |
| Doxorubicin plus dacarbazine                    | 4 (6)                         |
