# Supplementary material for: Anthracycline-based and gemcitabine-based chemotherapy in the adjuvant setting for stage I uterine leiomyosarcoma: a retrospective analysis at two reference centers
Source: PubMed Central journal article supplement (PMC7456084; doi:10.1186/s13569-020-00139-3), 2020-08-28
Supplement: 13569_2020_139_MOESM2_ESM.pdf [file 13569_2020_139_MOESM2_ESM.pdf]

**Additional Figure 1. Kaplan-Meier curves for disease-free survival and overall survival according to stage (panels A and B, respectively).**

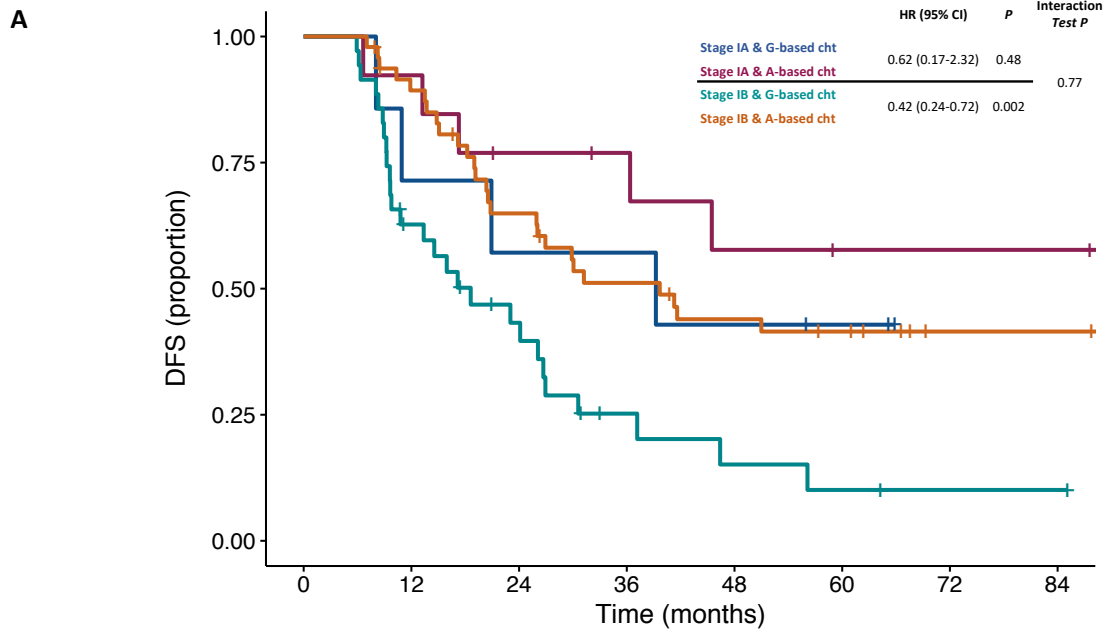

Number at risk

|    | 0  | 12 | 24 | 36 | 48 | 60 | 72 | 84 |
|----|----|----|----|----|----|----|----|----|
| 7  | 5  | 4  | 4  | 3  | 2  | 0  | 0  |    |
| 13 | 12 | 9  | 8  | 6  | 5  | 5  | 5  |    |
| 35 | 20 | 12 | 5  | 3  | 2  | 1  | 1  |    |
| 48 | 41 | 29 | 22 | 18 | 16 | 11 | 11 |    |

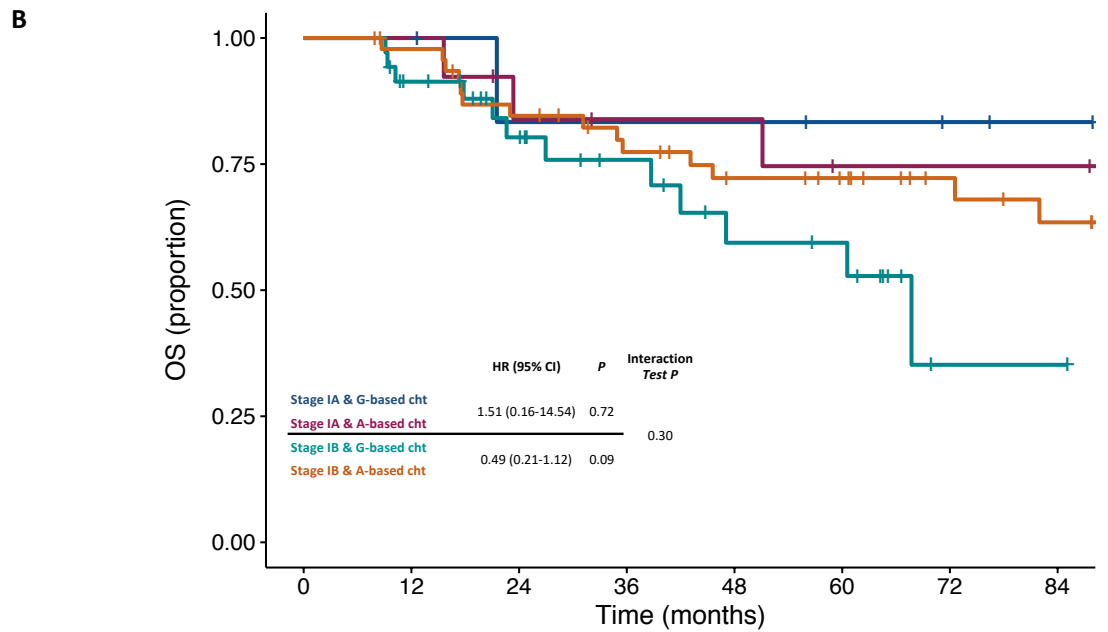

Number at risk

|    | 0  | 12 | 24 | 36 | 48 | 60 | 72 | 84 |
|----|----|----|----|----|----|----|----|----|
| 7  | 7  | 5  | 5  | 5  | 3  | 2  | 1  |    |
| 13 | 13 | 10 | 9  | 9  | 7  | 7  | 7  |    |
| 35 | 29 | 21 | 15 | 10 | 9  | 1  | 1  |    |
| 48 | 45 | 38 | 32 | 27 | 24 | 17 | 14 |    |
